# Supplementary material for: Green synthesis of nitrogen and sulfur co-doped carbon dots from Allium fistulosum for cell imaging
Source: Royal Society of Chemistry journal article supplement (doi:10.1039/c8nj05783d), 2018-11-30
Supplement: c8nj05783d1.pdf [file c8nj05783d1.pdf]

## Supporting Information

### Green Synthesis of Nitrogen and Sulfur Co-doped Carbon Dots from Allium Fistulosum for Cell Imaging

Zhihong Wei,<sup>‡a</sup> Boyang Wang,<sup>‡a</sup> Yuan Liu,<sup>b</sup> Zhongyi Liu,<sup>\*a</sup> Huan Zhang,<sup>c</sup> Shijie Zhang,<sup>c</sup> Junbiao Chang,<sup>a</sup> Siyu Lu<sup>\*a</sup>

a. College of Chemistry and Molecular Engineering, Zhengzhou University, Zhengzhou, 450001, China.

E-mail: sylvu2013@zzu.edu.cn, liuzhongyi@zzu.edu.cn

b. College of Materials Science and Engineering, Zhengzhou University, Zhengzhou 450001, China.

c. School of Life Sciences, Zhengzhou University, Zhengzhou, 450001, China.

<sup>‡</sup> Equally contributed.

### Supporting Data

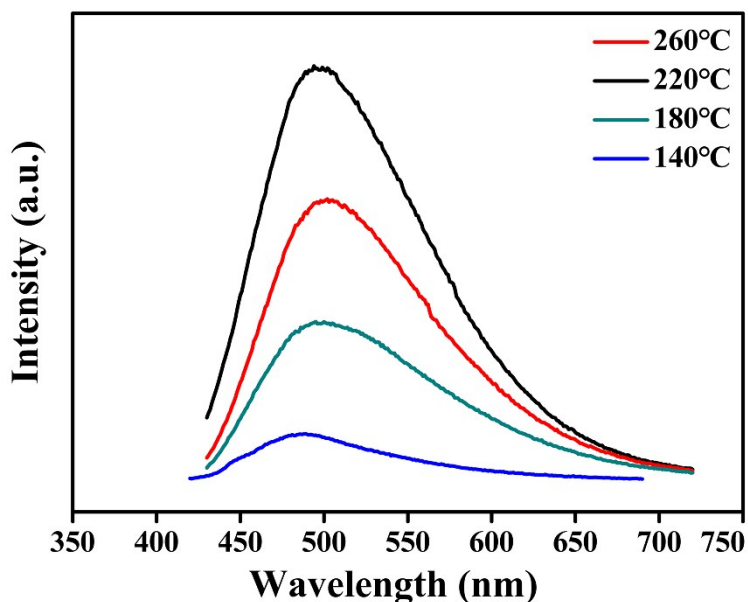

**Figure S1.** PL emission spectra of optimized CDs at different temperature (140, 180, 220, 260°C).

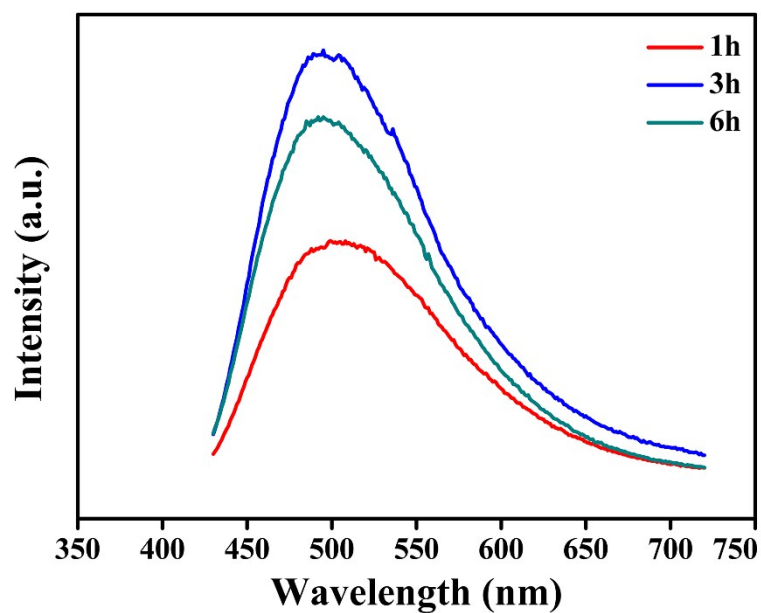

**Figure S2.** PL emission spectra of optimized CDs at different hydrothermal time at 220°C.

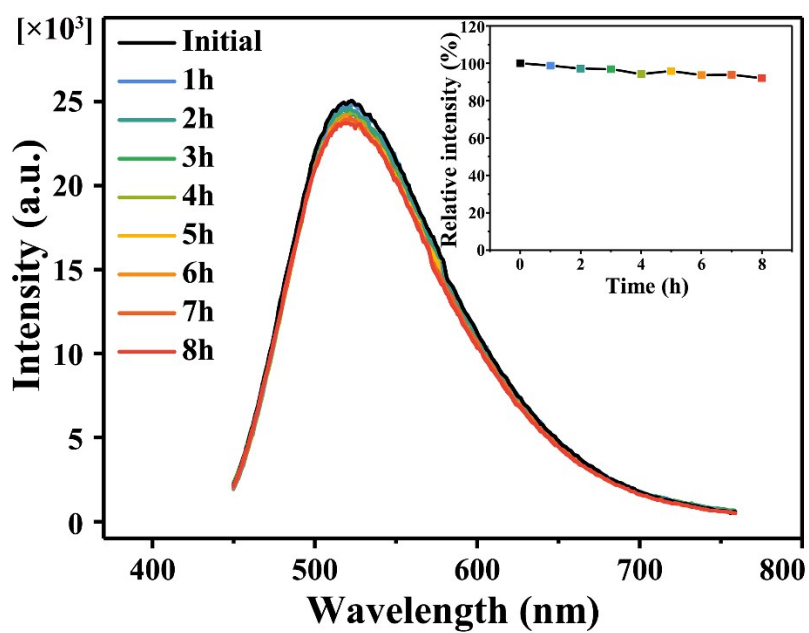

**Figure S3.** The stability test of fluorescence intensity on excitation time for Af-CDs in DI water (365nm lamp).

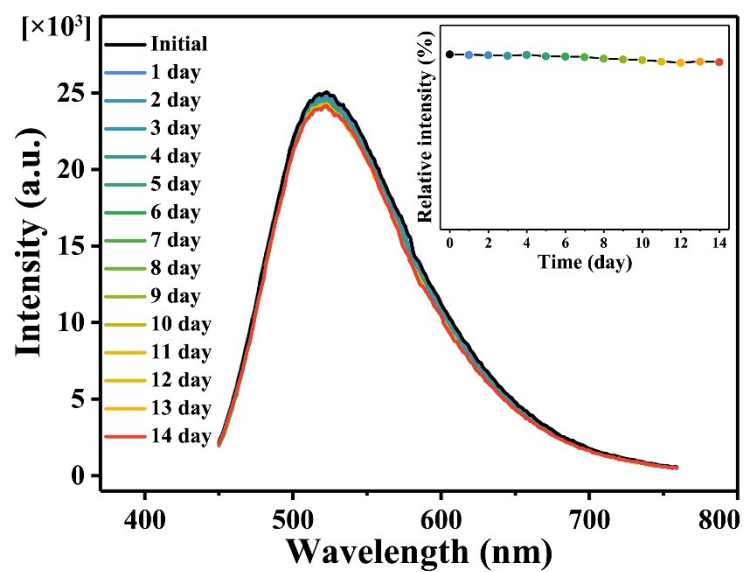

**Figure S4.** The stability test of fluorescence intensity on storage time for Af-CDs in DI water.
